# Supplementary material for: Regulating Immunogenicity and Tolerogenicity of Bone Marrow-Derived Dendritic Cells through Modulation of Cell Surface Glycosylation by Dexamethasone Treatment
Source: Front Immunol. 2017 Oct 30;8:1427. doi: 10.3389/fimmu.2017.01427 (PMC5670353; doi:10.3389/fimmu.2017.01427)
Supplement: Table S2 — Lectin names and common major binding ligands. Table listing the abbreviations, the kingdom, species, common name, and major binding ligand of the lectins used in lectin micro array profiling. [file table_2.xls]

## Sheet: Sheet1
No	Abbreviation	Origin	Species	Common name	Major Ligand(s)	Printed in	Supplier
1	AIA, Jacalin	Plant	Artocarpus integrifolia	Jack fruit lectin	Gal, Gal-β-(1,3)-GalNAc (sialylation tolerant)	Gal	EY Labs
2	RPbAI	Plant	Robinia pseudoacacia	Black locust lectin	Gal, GalNAc	Gal	EY Labs
3	PA-I	Bacteria	Pseudomonas aeruginosa	Pseudomonas lectin	Gal, Gal derivatives	Gal	Sigma Aldrich
4	SNA-II	Plant	Sambucus nigra	Sambucus lectin-II	Gal/GalNAc	Gal	EY Labs
5	SJA	Plant	Sophora japonica	Pagoda tree lectin	β-GalNAc	Gal	EY Labs
6	DBA	Plant	Dolichos biflorus	Horse gram lectin	GalNAc	Gal	EY Labs
7	GHA	Plant	Glechoma hederacea	Ground ivy lectin	GalNAc	Gal	EY Labs
8	SBA	Plant	Glycine max	Soy bean lectin	GalNAc	Gal	EY Labs
9	VVA-B4	Plant	Vicia villosa	Hairy vetch lectin	GalNAc	Gal	EY Labs
10	BPA	Plant	Bauhinia purpurea	Camels foot tree lectin	GalNAc/Gal	Gal	EY Labs
11	WFA	Plant	Wisteria floribunda	Japanese wisteria lectin	GalNAc/sulfated GalNAc	Gal	EY Labs
12	ACA	Plant	Amaranthus caudatus	Amaranthin	Sialylated/Gal-β-(1,3)-GalNAc	Lac	Vector Labs
13	ABL	Fungi	Agaricus bisporus	Edible mushroom lectin	Gal-β-(1,3)-GalNAc, GlcNAc	Lac	EY Labs
14	PNA	Plant	Arachis hypogaea	Peanut lectin	Gal-β-(1,3)-GalNAc	Gal	EY Labs
15	GSL-II	Plant	Griffonia simplicifolia	Griffonia/Bandeiraea lectin-II	GlcNAc	GlcNAc	EY Labs
16	sWGA	Plant	Triticum vulgaris	Succinyl WGA	GlcNAc	GlcNAc	EY Labs
17	DSA	Plant	Datura stramonium	Jimson weed lectin	GlcNAc	GlcNAc	EY Labs
18	STA	Plant	Solanum tuberosum	Potato lectin	GlcNAc oligomers	GlcNAc	EY Labs
19	LEL	Plant	Lycopersicum eculentum	Tomato lectin	GlcNAc-β-(1,4)-GlcNAc	GlcNAc	EY Labs
20	NPA	Plant	Narcissus pseudonarcissus	Daffodil lectin	α-(1,6)-Man	Man	EY Labs
21	GNA	Plant	Galanthus nivalis	Snowdrop lectin	Man-α-(1,3)-	Man	EY Labs
22	HHA	Plant	Hippeastrum hybrid	Amaryllis agglutinin	Man-α-(1,3)-Man-α-(1,6)-	Man	EY Labs
23	ConA	Plant	Canavalia ensiformis	Jack bean lectin	a-linked Man, Glc, GlcNAc	Man	EY Labs
24	Lch-B	Plant	Lens culinaris	Lentil isolectin B	Man, core fucosylated, agalactosylated biantennary N-glycans	Man	EY Labs
25	PSA	Plant	Pisum sativum	Pea lectin	Man, core fucosylated trimannosyl N-glycans	Man	EY Labs
26	WGA	Plant	Triticum vulgaris	Wheat germ agglutinin	NeuAc/GlcNAc	GlcNAc	EY Labs
27	MAA	Plant	Maackia amurensis	Maackia agglutinin	Sialic acid-α-(2,3)-Gal(NAc)	Lac	EY Labs
28	SNA-I	Plant	Sambucus nigra	Sambucus lectin-I	Sialic acid-α-(2,6)-Gal(NAc)	Lac	EY Labs
29	CCA	Animal	Cancer antennarius	California crab	O-acetylated sialic acids	Lac	EY Labs
30	PHA-L	Plant	Phaseolus vulgaris	Kidney bean leukoagglutinin	tri-/tetra-antennary β-Gal/Gal-β-(1,4)-GlcNAc	Lac	EY Labs
31	PCA	Plant	Phaseolus coccineus	Scarlet runner bean lectin	GlcNAc in complex oligosaccharides	Lac	Sigma Aldrich
32	PHA-E	Plant	Phaseolus vulgaris	Kidney bean erythroagglutinin	biantennary, bisecting GlcNAc, β-Gal/Gal-β-(1,4)-GlcNAc	Gal	EY Labs
33	RCA-I/120	Plant	Ricinus communis	Castor bean lectin I	Gal-β-(1, 4)-GlcNAc	Gal	Vector Labs
34	CPA	Plant	Cicer arietinum	Chickpea lectin	Complex oligosaccharides	Lac	EY Labs
35	CAA	Plant	Caragana arborescens	Pea tree lectin	Gal-β-(1, 4)-GlcNAc	Lac	EY Labs
36	ECA	Plant	Erythrina cristagalli	Cocks comb/coral tree lectin	Gal-β-(1, 4)-GlcNAc oligomers	Lac	EY Labs
37	AAL	Fungi	Aleuria aurantia	Orange peel fungus lectin	Fuc-α-(1,6)- and Fuc-α-(1,3)-linked	Fuc	Vector Labs
38	LTA	Plant	Lotus tetragonolobus	Lotus lectin	Fuc-α-(1,3)-, Fuc-α-(1→6)- and Fuc-α-(1→2)-linked	Fuc	EY Labs
39	UEA-I	Plant	Ulex europaeus	Gorse lectin-I	Fuc-α-(1,2)-linked	Fuc	EY Labs
40	EEA	Plant	Euonymous europaeus	Spindle tree lectin	Terminal α-linked Gal	Gal	EY Labs
41	GSL-I-B4	Plant	Griffonia simplicifolia	Griffonia/Bandeiraea lectin-I	Terminal α-linked Gal	Gal	EY Labs
42	MPA	Plant	Maclura pomifera	Osage orange lectin	Terminal α-linked Gal	Gal	EY Labs
43	VRA	Plant	Vigna radiata	Mung bean lectin	Terminal α-linked Gal	Gal	EY Labs
44	MOA	Fungi	Marasmius oreades	Fairy ring mushroom lectin	Terminal α-linked Gal	Gal	EY Labs
45	BSA		Bovine serum albumin			NS
46	PBS		Phosphate buffered saline			NS
47
48
49
50
